# Supplementary material
Source: MDPI journal article supplement (https://www.mdpi.com/2571-8789/2/3/47)
Supplement: s1 [file s1]

## Supplementary

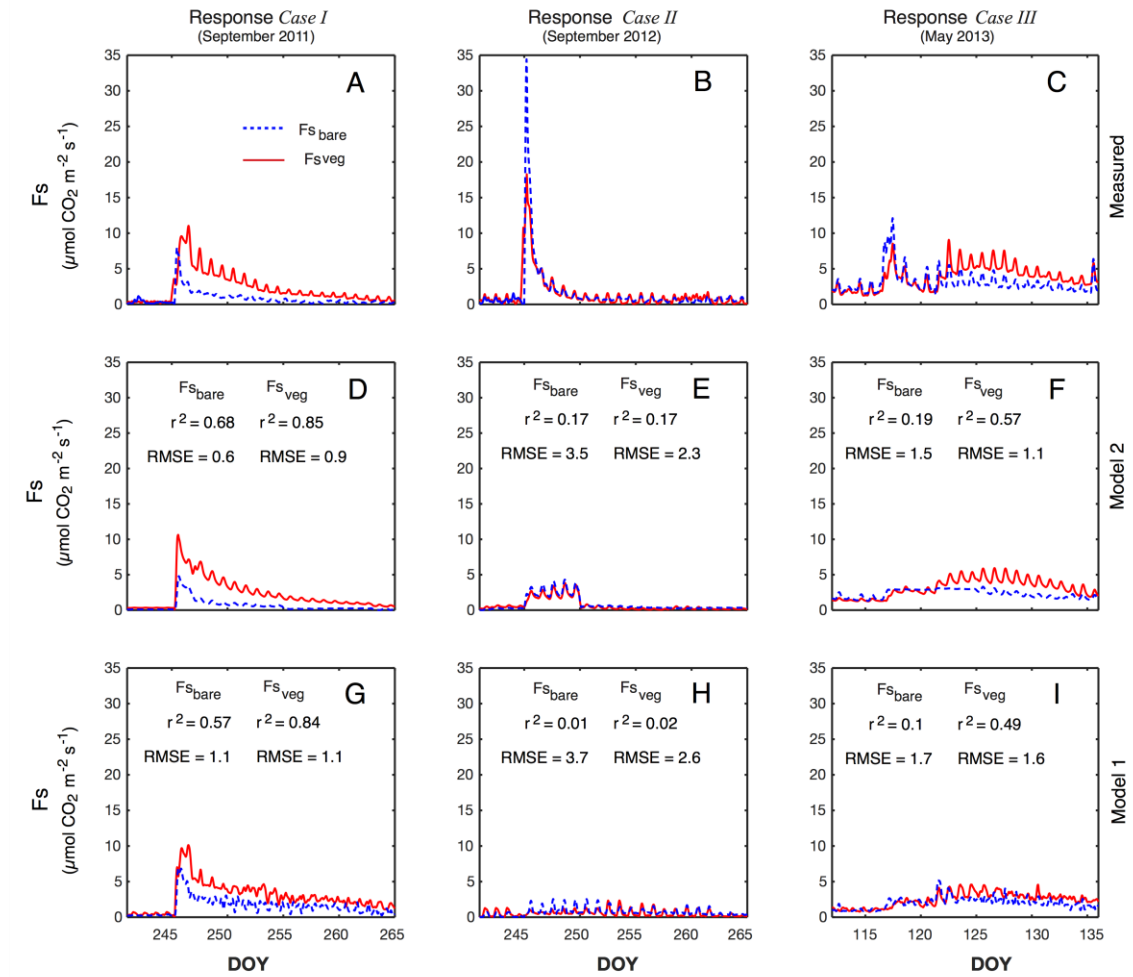

Figure S1. Measured pulse responses of  $F_s$  (A-C), model output using modeling approach 2 (D-F) and modeling approach 1 (G-I). Responses are defined as *Case I-III*, and are identified in Figures 1, and 3. Solid lines represent variables measured under vegetation and dashed lines represent variables measured in bare soil.  $F_s$  = soil respiration. The numbers in the x-axis represent the day of the year (DOY) for years 2011 to 2013 for each panel.
